# Supplementary material for: Study of photophysical properties of 5-deazaalloxazine and 1,3-dimethyl-5-deazaalloxazine in dependence of pH using different spectral techniques
Source: Royal Society of Chemistry journal article supplement (doi:10.1039/c5cp01566a), 2015-01-01
Supplement: c5cp01566a1.pdf [file c5cp01566a1.pdf]

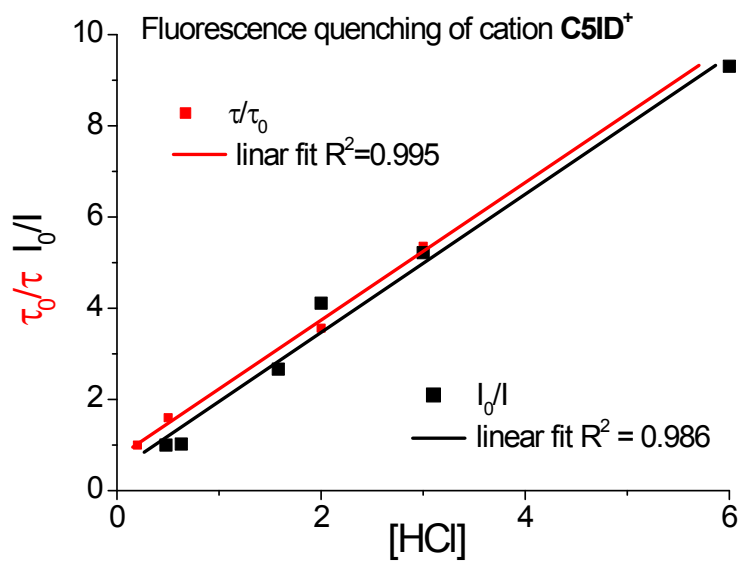

**Figure 1s.** Fluorescence quenching in steady-state and time-resolved experiment, on the basis of Stern-Volmer relations for **C5ID<sup>+</sup>** causing by  $H^+$ ; correlation coefficients ( $R^2$ ) 0.986 for steady-state measurements; 0.995 for time-resolved measurement. Lifetime measurement were performed using  $\lambda_{exc} = 375$  nm and observed at  $\lambda_{em} = 420$  nm.

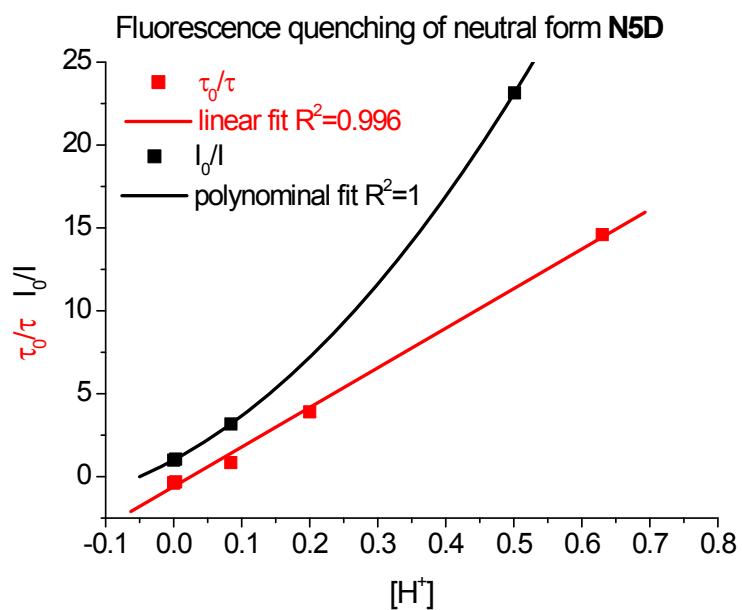

**Figure 2s.** Fluorescence quenching in steady-state and time-resolved experiment for **N5D** causing by  $H^+$ ; correlation coefficients ( $R^2$ ) 1 for steady-state measurements; 0.996 for time-resolved measurement. Lifetime measurement were performed using  $\lambda_{exc} = 375$  nm and observed at  $\lambda_{em} = 420$  nm.

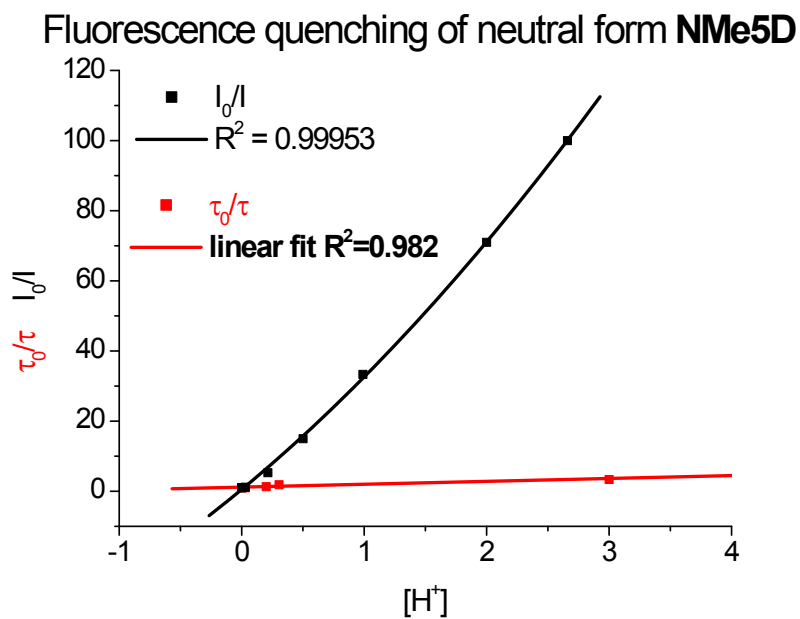

**Figure 3s.** Fluorescence quenching in steady-state and time-resolved experiment for **NMe5D** causing by H<sup>+</sup>; correlation coefficients (R<sup>2</sup>) 0.994 for steady-state measurements; 0.982 for time-resolved measurement. Lifetime measurement were performed using λ<sub>exc</sub> = 375 nm and observed at λ<sub>em</sub> = 430 nm.

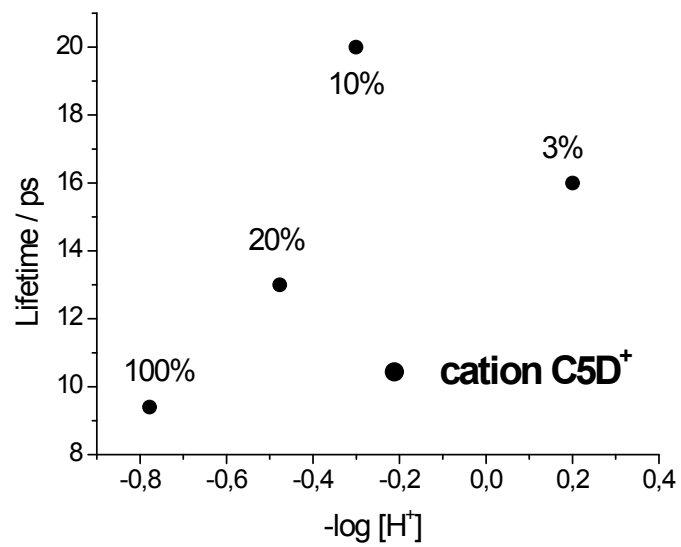

**Figure 4s.** A plot of lifetime of alloxazinic cation of 5-DAll (C5D<sup>+</sup>), vs. -log [H<sup>+</sup>] can be seen on Figure 4s.
